# Supplementary material for: Defining the normal range of fractional exhaled nitric oxide in children: one size does not fit all
Source: PubMed Central journal article supplement — ERJ Open Res. 2022 Sep 12;8(3):00319-2022. doi: 10.1183/23120541.00319-2022 (PMC9465007; doi:10.1183/23120541.00319-2022), 2022-09-12
Supplement: 00319-2022.SUPPLEMENT.pdf [file 00319-2022.SUPPLEMENT.pdf]

**Defining the normal range of fractional exhaled nitric oxide in children and adolescents –  
one size does not fit all**

**Online supplement**

*Figure E1. Population selection*

*Figure E2: Inclusion and exclusion of FeNO measurements*

*Figure E3. Distribution of FeNO in MAAS cohort: A) box plot of log (FeNO) in healthy, atopic and asthmatic children at 4 clinical follow up at different age. Log FeNO is present for visual clarity. B) Scatterplot for FeNO in ppb stratified by atopic status and asthma.*

*Figure E4. When asthma was stratified by atopic status, FeNO levels were markedly different in MAAS cohort.*

*Figure E5. The sex disparity in FeNO in non-asthmatic children beyond the age 13-16 years, coinciding with disparity in height (MAAS cohort).*

Table E1. Definitions of variables and populations in MAAS and SEATON birth cohorts

|                                                        | MAAS                                                                                                                                                                                                                                                                                                     | SEATON                                                                                                                                                                                                                                                                                                                                                          |
|--------------------------------------------------------|----------------------------------------------------------------------------------------------------------------------------------------------------------------------------------------------------------------------------------------------------------------------------------------------------------|-----------------------------------------------------------------------------------------------------------------------------------------------------------------------------------------------------------------------------------------------------------------------------------------------------------------------------------------------------------------|
| <b>Definitions of variables:</b>                       |                                                                                                                                                                                                                                                                                                          |                                                                                                                                                                                                                                                                                                                                                                 |
| <b>Current wheeze</b>                                  | <p><u>Age 8, 11 and 13-16 years:</u><br/>A positive answer to the question “Has your child had wheezing or whistling in the chest in the past 12 months?”</p> <p><u>Age 18 years:</u><br/>A positive answer to the question “Have you had wheezing or whistling in the chest in the past 12 months?”</p> | <p><u>Age 10 years:</u><br/>A positive answer to the question “Has your child had wheezing or whistling in the chest in the past 12 months (but not from the nose or throat)?”</p> <p><u>Age 15 years:</u><br/>A positive answer to the question “Have you had wheezing or whistling in the chest in the last 12 months (but not from the nose or throat)?”</p> |
| <b>History of physician diagnosed asthma</b>           | <p><u>Age 8, 11 and 13-16 years:</u><br/>A positive answer to the question “Has the doctor ever told you that your child had asthma?”</p> <p><u>Age 18 years:</u><br/>A positive answer to the question “Has the doctor ever told you had asthma?”</p>                                                   | <p><u>Age 10 years:</u><br/>Positive answers to the question “Has your child ever suffered from asthma?” <b>and</b> “Confirmed by a doctor?”</p> <p><u>Age 15 years:</u><br/>Positive answers to the question “Have you ever suffered from asthma?” <b>and</b> “Has this been confirmed by a doctor?”</p>                                                       |
| <b>Definition of populations:</b>                      |                                                                                                                                                                                                                                                                                                          |                                                                                                                                                                                                                                                                                                                                                                 |
| <b>Non-asthmatic children*</b>                         | <u>Absence</u> of all of the following: current wheeze, history of physician diagnosed asthma and current asthma medication use                                                                                                                                                                          | <u>Absence</u> of all of the following: current wheeze <b>and</b> history of physician diagnosed asthma                                                                                                                                                                                                                                                         |
| <b>Healthy non-atopic children*</b>                    | <u>Absence</u> of all of the following: current wheeze, history of physician diagnosed asthma, current asthma medication use <b>and</b> evidence of SPT sensitisation to common inhaled allergens                                                                                                        | <u>Absence</u> of all of the following: current wheeze, history of physician diagnosed asthma, <b>and</b> evidence of SPT sensitisation to common inhaled allergens.                                                                                                                                                                                            |
| <b>Asymptomatic non-asthmatic but atopic children*</b> | Children with SPT sensitisation to at least one of eight common inhalant allergens but no current wheeze, current asthma medications or history of physician diagnosed asthma.                                                                                                                           | Children with SPT sensitisation to at least one common inhalant allergens (cat, dog, grass or house dust mite at age 10 years, and dog, grass and house dust mite at 15 years), but no current wheeze or history of physician diagnosed asthma.                                                                                                                 |

Table E2 RADicA study visits and diagnostic procedures. [1]

---

|                                                                                                          |                                                                                |                                                                                |
|----------------------------------------------------------------------------------------------------------|--------------------------------------------------------------------------------|--------------------------------------------------------------------------------|
| <b>Current asthma</b>                                                                                    | Children with current wheeze <b>and</b> history of physician-diagnosed asthma. | Children with current wheeze <b>and</b> history of physician-diagnosed asthma. |
| SPT: Skin prick test<br>*Populations that were included in the model development and external validation |                                                                                |                                                                                |

|                                                  | Visit 1                                          | Visit 2                   | Optional Visit        | Visit 3                 | Visit 4                   |
|--------------------------------------------------|--------------------------------------------------|---------------------------|-----------------------|-------------------------|---------------------------|
| <b>Diagnostic procedures</b>                     | Screening/<br>baseline/<br>dispense<br>treatment | Methacholine<br>challenge | Mannitol<br>challenge | 1-3week<br>ICS response | 6-14 week<br>ICS response |
| Clinical history                                 | ✓                                                |                           |                       |                         |                           |
| Symptoms<br>(Asthma<br>Control<br>Questionnaire) | ✓                                                | ✓                         | ✓                     | ✓                       | ✓                         |
| Examination                                      | ✓                                                |                           |                       |                         | ✓                         |
| FeNO                                             | ✓                                                | ✓                         |                       | ✓                       | ✓                         |
| Skin Prick test*                                 | ✓                                                |                           |                       |                         |                           |
| Blood<br>Eosinophils                             | ✓                                                |                           |                       |                         | ✓                         |
| Spirometry                                       | ✓                                                | ✓                         | ✓                     | ✓                       | ✓                         |
| Bronchodilator<br>Reversibility                  | ✓                                                |                           |                       |                         |                           |
| Mannitol<br>challenge                            |                                                  |                           | ✓                     |                         |                           |
| Methacholine<br>challenge                        |                                                  | ✓                         |                       |                         | ✓                         |

8 weeks of ICS (fluticortide 100mcg twice a day)

**The expert panel objective evidence review outcome definitions:**

**Asthma:** panel agrees asthma diagnosis based on clinical information and all available objective evidence before and after treatment.

**Not asthma:** panel agrees asthma is confidently ruled out following review of clinical information and objective evidence before and after treatment.

**Possible asthma:** panel cannot confirm diagnosis despite all tests being completed

**Insufficient evidence:** panel unable to confirm or refute diagnosis due to incomplete tests.

---

\*SPT to cat, dog, birch, grass mix, Aspergillus fumigatus, Alternaria alternata, Cladosporium spp., house dust mite

---

**Table E3. Baseline characteristics in patient who had FeNO measurements and those without**

*populations in MAAS cohort.*

|                                                     | <b>With FeNO<br/>measurements<br/>(n=840)</b> | <b>Without FeNO<br/>measurements<br/>(n=344)</b> | <b>P-value</b> |
|-----------------------------------------------------|-----------------------------------------------|--------------------------------------------------|----------------|
| <b>Sex (male) n(%)</b>                              | 443 (52.7%)                                   | 199 (57.8%)                                      | 0.12           |
| <b>Ethnicity (White) n(%)</b>                       | 786 (96.0%)                                   | 272 (92.2%)                                      | 0.02           |
| <b><u>Socioeconomic status</u></b>                  |                                               |                                                  |                |
| <b>Managerial n(%)</b>                              | 373/586 (63.6%)                               | 91/168 (54.2%)                                   | <0.001         |
| <b>Intermediate n(%)</b>                            | 137/586 (23.4%)                               | 28 /168 (16.7%)                                  |                |
| <b>Routine n(%)</b>                                 | 57/586 (9.7%)                                 | 37/168 (22.0%)                                   |                |
| <b>Not working n(%)</b>                             | 14/586 (2.4%)                                 | 12/168 (7.1%)                                    |                |
| <b>unclassified n(%)</b>                            | 5 /586 (0.9%)                                 | -                                                |                |
| <b><u>SPT sensitisation at</u></b>                  |                                               |                                                  |                |
| <b>8 years n(%)</b>                                 | 254/771 (32.9%)                               | 60/156 (38.5%)                                   | 0.22           |
| <b>11 years n(%)</b>                                | 247/713 (34.6%)                               | 25/70 (35.7%)                                    | 0.96           |
| <b>13-16 years n(%)</b>                             | 316 /601 (52.6%)                              | 15/31 (48.4%)                                    | 0.79           |
| <b>18 years n(%)</b>                                | 275/ 491 (56%)                                | 10/16 (62.5%)                                    | 0.80           |
| <b><u>Current wheeze at</u></b>                     |                                               |                                                  |                |
| <b>8 years n(%)</b>                                 | 148 /828 (17.8%)                              | 37/197 (18.8%)                                   | 0.85           |
| <b>11 years n(%)</b>                                | 149/794 (18.8%)                               | 26/133 (19.5%)                                   | 0.93           |
| <b>13-16 years n(%)</b>                             | 114/661 (17.2%)                               | 13/79 (16.5%)                                    | 0.98           |
| <b>18 years n(%)</b>                                | 137/550 (24.9%)                               | 9/43 (20.9%)                                     | 0.69           |
| <b><u>History of doctor-diagnosed asthma at</u></b> |                                               |                                                  |                |
| <b>8 years n(%)</b>                                 | 191/807 (23.7%)                               | 56 /186 (30.1%)                                  | 0.08           |
| <b>11 years n(%)</b>                                | 212/779 (27.2%)                               | 41/131 (31.3%)                                   | 0.39           |
| <b>13-16 years n(%)</b>                             | 200/ 663 (30.2%)                              | 29/81 (35.8%)                                    | 0.36           |
| <b>18 years n(%)</b>                                | 140/505 (27.7%)                               | 16/39 (41.0%)                                    | 0.11           |

Table E4. Proportion of healthy, atopic and asthma children at each follow-up within MAAS cohort.

| <b>MAAS Follow-up</b> | <b>Healthy n (%)</b> | <b>Atopic n (%)</b> | <b>Asthmatic n (%)</b> | <b>Total n (%)</b> |
|-----------------------|----------------------|---------------------|------------------------|--------------------|
| <b>Year 8</b>         | 470 (63.6%)          | 147 (19.9%)         | 122 (16.5%)            | 739                |
| <b>Year 11</b>        | 379 (61.2%)          | 128 (20.7%)         | 125 (18.1%)            | 632                |
| <b>Year 13-16</b>     | 227 (45.9%)          | 150 (30.3%)         | 118 (23.8%)            | 495                |
| <b>Year 18</b>        | 160 (41.5%)          | 134 (34.7%)         | 92 (23.8%)             | 386                |

Table E5. Differences in FeNO across age groups in all children in MAAS cohort.

| Variables                       | Median (IQR) FeNO<br>When condition present | Median (IQR) FeNO<br>When condition<br>absent | P-value |
|---------------------------------|---------------------------------------------|-----------------------------------------------|---------|
| <b>Age 8 years</b>              |                                             |                                               |         |
| Current asthma medication       | 23.9 (10.5-50.3)<br>n=62                    | 9 (6.9-13.4)<br>n=355                         | <0.001  |
| Current wheeze                  | 23.1 (10.0-46.3)<br>N=71                    | 9.1 (6.8-13.2)<br>N=346                       | <0.001  |
| Physician diagnosed asthma ever | 11.8 (7.7-34.2)<br>N=94                     | 9.2 (6.9-13.5)<br>N=311                       | <0.001  |
| Current hayfever                | 16.4 (8.6-34.1)<br>N=62                     | 9.2 (6.8-13.4)<br>N=332                       | <0.001  |
| SPT sensitisation               | 20.7 (10.5-40.0)<br>N=128                   | 8.5 (6.6-11.4)<br>N=275                       | <0.001  |
| <b>Age 11 years</b>             |                                             |                                               |         |
| Current asthma medication       | 26.0 (11.0-51.1)<br>N=116                   | 9.3 (7-14.2)<br>N=484                         | <0.001  |
| Current wheeze                  | 27 (14.1-53.6)<br>N=107                     | 9.4 (7.0-13.8)<br>N=493                       | <0.001  |
| Physician diagnosed asthma ever | 16.8 (8.7-40.2)<br>N=152                    | 9 (6.9-14.0)<br>N=434                         | <0.001  |
| Current hayfever                | 19.6 (10.6-39.8)<br>N=140                   | 9 (6.9-14.0)<br>N=441                         | <0.001  |
| SPT sensitisation               | 25.3 (11.8-48.2)<br>N=191                   | 8.5 (6.6-11.3)<br>N=383                       | <0.001  |
| <b>Age 13-16 years</b>          |                                             |                                               |         |
| Current asthma medication       | 33 (15.0- 64.5)<br>N=416                    | 16 (11-28)<br>N=74                            | <0.001  |
| Current wheeze                  | 26 (13.8-63.2)<br>N=83                      | 16 (11-29)<br>N=396                           | <0.001  |
| Physician diagnosed asthma ever | 25.6 (13.0 -48.4)<br>N=143                  | 15 (11-26)<br>N=337                           | <0.001  |
| Current hayfever                | 24.5 (15.2-40.0)<br>N=187                   | 14 (10.5-25)<br>N=281                         | <0.001  |
| SPT sensitisation               | 26(15.2-46)<br>N=258                        | 12.8 (10-18)<br>N=220                         | <0.001  |
| <b>Age 18 years</b>             |                                             |                                               |         |
| Current asthma medication       | 25 (11.5-43.5)<br>N=83                      | 15 (10-24)<br>N=340                           | <0.001  |
| Current wheeze                  | 24 (11.5-43.5)<br>N=107                     | 14 (9.8-23.0)<br>N=316                        | <0.001  |
| Physician diagnosed asthma ever | 24.5 (11.38-41.5)<br>N=112                  | 14 (10-22)<br>N=279                           | <0.001  |
| Current hayfever                | 20 (12-36)<br>N=203                         | 13 (9-19)<br>N=220                            | <0.001  |
| SPT sensitisation               | 21.5 (13-36)<br>N=238                       | 12 (8-17)<br>N=181                            | <0.001  |

Table E6. Longitudinal correlations between FeNO and height, weight, age, and BMI in healthy non-atopic and atopic children without asthma using repeated measure correlation-MAAS cohort.

| Variables                   | Correlation coefficient<br>r | Bootstrapped 95%CI | p-value |
|-----------------------------|------------------------------|--------------------|---------|
| <b>Healthy non-atopic</b>   |                              |                    |         |
| <i>Height</i>               | 0.42                         | 0.33-0.50          | <0.001  |
| <i>Age</i>                  | 0.39                         | 0.29-0.47          | <0.001  |
| <i>Weight</i>               | 0.41                         | 0.32-0.49          | <0.001  |
| <i>BMI</i>                  | 0.33                         | 0.24-0.42          | <0.001  |
| <b>Atopic non-asthmatic</b> |                              |                    |         |
| <i>Height</i>               | 0.26                         | 0.10-0.40          | 0.001   |
| <i>Age</i>                  | 0.22                         | 0.06-0.36          | 0.006   |
| <i>Weight</i>               | 0.26                         | 0.11-0.40          | 0.001   |
| <i>BMI</i>                  | 0.26                         | 0.11-0.10          | 0.001   |



Table E7. The sex differences of FeNO in children without asthma in MAAS Cohort.

| Age groups<br>(n, male:female) | FeNO in boys (ppb)<br>Median (IQR) | FeNO in girls (ppb)<br>Median (IQR) | p-value          |
|--------------------------------|------------------------------------|-------------------------------------|------------------|
| All children without asthma    |                                    |                                     |                  |
| 8 years<br>(n=135:140)         | 8.7 (6.3-12.4)                     | 9.3 (7-13.1)                        | 0.192            |
| 11 years<br>(n=175:212)        | 9 (6.9-13.7)                       | 9.4 (7.1-12.8)                      | 0.853            |
| 13-16 years<br>(n=147:162)     | 18.2 (13-30)                       | 13 (10.1-20)                        | <b>&lt;0.001</b> |
| 18 years<br>(n=109:140)        | 17 (12-25)                         | 11.5 (9-18)                         | <b>&lt;0.001</b> |
| Healthy non-atopic children    |                                    |                                     |                  |
| 8 years<br>(n=101:110)         | 8.1 (6.2-10.4)                     | 9 (7-11.4)                          | 0.104            |
| 11 years<br>(n=123:171)        | 8.4 (6.6-10.6)                     | 8.6 (6.8-11.3)                      | 0.489            |
| 13-16 years<br>(n=67:101)      | 15 (11.2-19)                       | 12 (10-16)                          | <b>0.017</b>     |
| 18 years<br>(n=49:86)          | 15 (10-20)                         | 10 (8-14)                           | <b>&lt;0.001</b> |
| Atopic children without asthma |                                    |                                     |                  |
| 8 years<br>(n=34:30)           | 12.8 (7.5-25.4)                    | 15.1 (8.0-29.5)                     | 0.493            |
| 11 years<br>(n=52:41)          | 14.8 (8.3-29.4)                    | 17.3 (9.9-33.7)                     | 0.388            |
| 13-16 years<br>(n=80:61)       | 27.4 (17-41.8)                     | 17 (11-35)                          | <b>0.017</b>     |
| 18 years<br>(n=60:54)          | 19(13-29)                          | 17 (10-31.8)                        | 0.534            |

Table E8. Difference in height between non-asthmatic boys and girls at each follow up in MAAS Cohort.

| Clinical follow up   | Boys height (cm) | Girls height (cm) | p-value |
|----------------------|------------------|-------------------|---------|
|                      | Mean (SD)        | Mean (SD)         |         |
| Year 8 follow-up     | 129 (5.0)        | 128 (5.0)         | 0.115   |
| Year 11 follow-up    | 148 (7.2)        | 149 (7.3)         | 0.175   |
| Year 13-16 follow-up | 176.0 (6.7)      | 165 (6.2)         | <0.001  |
| Year 18 follow-up    | 180 (7.0)        | 166 (6.0)         | <0.001  |

Table E9. Characteristics of Tanner Scale at age 11 and 13-16 years follow-up in non-asthmatic children in MAAS cohort.

| Tanner Scale                    | Age 11 years follow up, Median (IQR) score | Age 13-16 years follow up, Median (IQR) score | P-value |
|---------------------------------|--------------------------------------------|-----------------------------------------------|---------|
| Pubic hair scale (male)         | 1 (1-2)<br>N=189                           | 5 (4-5)<br>N=186                              | <0.001  |
| Male external genitalia scale   | 2 (2-3)<br>N=179                           | 4 (4-5)<br>N=179                              | <0.001  |
| Pubic hair scale (female)       | 1 (1-3)<br>N=241                           | 4(4-5)<br>N=199                               | <0.001  |
| Female breast development scale | 2 (1-3)<br>N=241                           | 4 (4-5)<br>N=199                              | <0.001  |

Table E10. Mixed effect quantile regression for 50<sup>th</sup>, 75<sup>th</sup>, 90<sup>th</sup> and 98<sup>th</sup> percentiles for Tanner scale and FeNO in 11 and 13-16 year old non-asthmatic children. Following adjustment for height (multivariate analysis), the pubertal stages no longer remained significantly associated with FeNO.

| Pubertal stages                    | Univariate analysis         |                              |                  | Multivariate analysis <u>adjusted by height</u> in predicting FeNO |                    |
|------------------------------------|-----------------------------|------------------------------|------------------|--------------------------------------------------------------------|--------------------|
|                                    | Regression coefficient (RC) | Lower and upper bound for RC | P-value          | P-value for pubertal stage variables (after adjustment for height) | P-value for height |
| <i>50<sup>th</sup> percentile</i>  |                             |                              |                  |                                                                    |                    |
| Male external genitalia scale      | 2.44                        | 1.66, 3.22                   | <b>&lt;0.001</b> | 0.672                                                              | p<0.001            |
| Breast development scale (female)  | 0.63                        | 0.05, 1.22                   | 0.077            | 0.245                                                              | p=0.205            |
| Pubic hair scale (male and female) | 1.70                        | 1.28, 2.12                   | <b>&lt;0.001</b> | 0.212                                                              | p=0.016            |
| <i>75<sup>th</sup> percentile</i>  |                             |                              |                  |                                                                    |                    |
| Male external genitalia scale      | 4.81                        | 2.78, 6.84                   | <b>&lt;0.001</b> | 0.668                                                              | p<0.001            |
| Breast development scale (female)  | 1.53                        | 0.56, 2.51                   | <b>&lt;0.001</b> | 0.971                                                              | p=0.160            |
| Pubic hair scale (male and female) | 2.25                        | 1.14, 3.35                   | <b>&lt;0.001</b> | 0.059                                                              | p=0.005            |
| <i>90<sup>th</sup> percentile</i>  |                             |                              |                  |                                                                    |                    |
| Male external genitalia scale      | 6.59                        | 3.92, 9.26                   | <b>&lt;0.001</b> | 0.665                                                              | p<0.001            |
| Breast development scale (female)  | 2.16                        | 0.42, 3.90                   | <b>0.033</b>     | 0.969                                                              | p=0.055            |
| Pubic hair scale (male and female) | 2.90                        | 2.07, 3.73                   | <b>&lt;0.001</b> | 0.06                                                               | p<0.001            |
| <i>98<sup>th</sup> percentile</i>  |                             |                              |                  |                                                                    |                    |
| Male external genitalia scale      | 6.88                        | -0.76, 14.52                 | <b>0.020</b>     | 0.667                                                              | p<0.001            |
| Breast development scale (female)  | 4.31                        | -2.67, 11.28                 | 0.328            | 0.965                                                              | p=0.005            |
| Pubic hair scale (male and female) | 3.68                        | -1.63, 9.00                  | 0.179            | 0.059                                                              | p<0.001            |

Table E11. Mixed-effect **univariate** quantile regression for the 50<sup>th</sup>, 75<sup>th</sup>, 90<sup>th</sup> and 98<sup>th</sup> percentiles in non-asthmatic children (both atopic and non-atopic) from MAAS cohort.

| Predictors                        | Regression Coefficient | bootstrap 95%CI | P-value |
|-----------------------------------|------------------------|-----------------|---------|
| <b>50<sup>th</sup> percentile</b> |                        |                 |         |
| Height                            | 0.18                   | (0.12, 0.23)    | <0.001  |
| Weight                            | 0.09                   | (0.08, 0.11)    | 0.004   |
| Age                               | 0.51                   | (0.36, 0.67)    | <0.001  |
| Sex<br>(girls compared to boys)   | -1.95                  | (-4.84, -1.00)  | 0.031   |
| <b>75<sup>th</sup> percentile</b> |                        |                 |         |
| Height                            | 0.22                   | (0.16, 0.27)    | <0.001  |
| Weight                            | 0.28                   | (0.23, 0.32)    | <0.001  |
| Age                               | 0.85                   | (0.68, 0.97)    | <0.001  |
| Sex (girls compared to boys)      | 0.19                   | (-6.18, 2.33)   | 0.936   |
| <b>90<sup>th</sup> percentile</b> |                        |                 |         |
| Height                            | 0.32                   | (0.25, 0.38)    | <0.001  |
| Weight                            | 0.46                   | (0.38, 0.49)    | <0.001  |
| Age                               | 1.22                   | (1.05, 1.46)    | <0.001  |
| Sex<br>(girls compared to boys)   | 1.48                   | (-5.04, 3.96)   | 0.427   |
| <b>98<sup>th</sup> percentile</b> |                        |                 |         |
| Height                            | 0.57                   | (0.49, 0.66)    | <0.001  |
| Weight                            | 0.31                   | (0.24, 0.45)    | <0.001  |
| Age                               | 2.39                   | (1.65, 2.89)    | <0.001  |
| Sex (girls compared to boys)      | -5.53                  | (-13.31, 16.50) | 0.534   |

### **Chart development in healthy non-atopic children and atopic children separately**

To establish percentiles ranges in non-asthma children (defined as no current wheeze, no history of physician-diagnosed asthma *and* not on asthma medications), stratified by atopy, univariate analysis for the 50<sup>th</sup>, 75<sup>th</sup>, 90<sup>th</sup> and 98<sup>th</sup> percentiles FeNO were performed within children with and without atopy separately (non-atopic children: Tables E11-E12, Figures E9; atopic children: Tables E13-14, Figure E10). Variables with  $p < 0.10$  in the univariate analysis (Tables E11 and E13) were included in the multivariate backwards regression model and only height remained significant. The final equations and chart are presented in Tables E12 and E14 and Figures E9-10.

#### In healthy non-atopic children

| <i>Table E12. Mixed-effect univariate quantile regression for the 50<sup>th</sup>, 75<sup>th</sup>, 90<sup>th</sup> and 98<sup>th</sup> percentiles in healthy non-atopic children from MAAS cohort.</i> |                               |                           |                |
|----------------------------------------------------------------------------------------------------------------------------------------------------------------------------------------------------------|-------------------------------|---------------------------|----------------|
| <b>Predictors</b>                                                                                                                                                                                        | <b>Regression Coefficient</b> | <b>Bootstrapped 95%CI</b> | <b>P-value</b> |
| <b>50<sup>th</sup> percentile</b>                                                                                                                                                                        |                               |                           |                |
| Height                                                                                                                                                                                                   | 0.10                          | 0.07, 0.12                | <0.001         |
| Weight                                                                                                                                                                                                   | 0.06                          | 0.05, 0.07                | 0.001          |
| Exact age                                                                                                                                                                                                | 0.37                          | 0.33, 0.41                | <0.001         |
| Sex (girls compared to boys)                                                                                                                                                                             | 0.05                          | -0.17, 0.36               | 0.916          |
| <b>75<sup>th</sup> percentile</b>                                                                                                                                                                        |                               |                           |                |
| Height                                                                                                                                                                                                   | 0.12                          | 0.09, 0.15                | <0.001         |
| Weight                                                                                                                                                                                                   | 0.13                          | 0.11-0.14                 | <0.001         |
| Exact age                                                                                                                                                                                                | 0.59                          | 0.54, 0.65                | <0.001         |
| Sex (girls compared to boys)                                                                                                                                                                             | -0.60                         | -1.29, 0.07               | 0.453          |
| <b>90<sup>th</sup> percentile</b>                                                                                                                                                                        |                               |                           |                |
| Height                                                                                                                                                                                                   | 0.15                          | 0.12, 0.18                | <0.001         |
| Weight                                                                                                                                                                                                   | 0.20                          | 0.16, 0.25                | <0.001         |
| Exact age                                                                                                                                                                                                | 0.84                          | 0.71, 0.98                | <0.001         |
| Sex (girls compared to boys)                                                                                                                                                                             | 1.57                          | 0.68, 2.23                | 0.204          |
| <b>98<sup>th</sup> percentile</b>                                                                                                                                                                        |                               |                           |                |
| Height                                                                                                                                                                                                   | 0.19                          | 0.14, 0.24                | <0.001         |
| Weight                                                                                                                                                                                                   | 0.35                          | 0.17, 0.42                | <0.001         |
| Exact age                                                                                                                                                                                                | 1.38                          | 0.71, 1.48                | <0.001         |
| Sex (girls compared to boys)                                                                                                                                                                             | -2.49                         | -3.23, 0.46               | 0.442          |

*Table E13, Intercepts and regression coefficient for healthy non-atopic children for 50<sup>th</sup>, 75<sup>th</sup>, 90<sup>th</sup> and 98<sup>th</sup> percentile.*

| Percentiles      | RC   | Bootstrapped<br>95% CI | Intercept | Equations             |
|------------------|------|------------------------|-----------|-----------------------|
| 50th             | 0.10 | 0.07, 0.12             | -4.4      | 0.10xheight (cm) -4.4 |
| 75 <sup>th</sup> | 0.12 | 0.09, 0.15             | -4.4      | 0.12xheight (cm) -4.4 |
| 90 <sup>th</sup> | 0.15 | 0.12 0.18              | -4.4      | 0.15xheight (cm) -4.4 |
| 98 <sup>th</sup> | 0.19 | 0.14, 0.24             | -4.3      | 0.19xheight (cm) -4.3 |

*Figure E6. A) FeNO percentile chart for healthy non-atopic children; B) FeNO percentile chart for atopic but non-asthmatic children.*

*In asymptomatic atopic children without asthma*

*Table E14. Mixed-effect univariate quantile regression for the 50<sup>th</sup>, 75<sup>th</sup>, 90<sup>th</sup> and 98<sup>th</sup> percentiles in asymptomatic atopic children without asthma from MAAS cohort.*

| Predictors                        | Regression Coefficient | Bootstrap 95%CI | P-value |
|-----------------------------------|------------------------|-----------------|---------|
| <b>50<sup>th</sup> percentile</b> |                        |                 |         |
| Height                            | 0.11                   | -0.03, 0.22     | 0.072   |
| Weight                            | 0.02                   | -0.11, 0.15     | 0.822   |
| Exact age                         | 0.62                   | 0.43, 0.73      | 0.06    |
| Sex (girls compared to boys)      | -1.31                  | -6.85, 2.86     | 0.598   |
| <b>75<sup>th</sup> percentile</b> |                        |                 |         |
| Height                            | 0.21                   | 0.07, 0.34      | 0.004   |
| Weight                            | 0.30                   | 0.14, 0.46      | 0.002   |
| Exact age                         | 0.96                   | 0.86, 1.24      | 0.002   |
| Sex (girls compared to boys)      | 0.98                   | -4.40, 6.60     | 0.604   |
| <b>90<sup>th</sup> percentile</b> |                        |                 |         |
| Height                            | 0.39                   | 0.22, 0.51      | <0.001  |
| Weight                            | 0.41                   | 0.39, 1.00      | 0.006   |
| Exact age                         | 1.42                   | 1.18, 1.76      | 0.043   |
| Sex (girls compared to boys)      | -0.0001                | -4.92, 16.02    | 1.0     |
| <b>98<sup>th</sup> percentile</b> |                        |                 |         |
| Height                            | 0.62                   | 0.46, 0.75      | <0.001  |
| Weight                            | 1.42                   | 0.89, 1.60      | <0.001  |
| Exact age                         | 2.69                   | -0.50, 5.89     | 0.10    |
| Sex (girls compared to boys)      | -2.01                  | -31.28, 38.99   | 0.80    |

*Table E15. Intercepts and regression coefficient for asymptomatic non-asthmatic but atopic children for 50<sup>th</sup>, 75<sup>th</sup>, 90<sup>th</sup> and 98<sup>th</sup> percentile.*

| Percentiles*     | RC   | Bootstrap 95%CI | Intercept | Equations              |
|------------------|------|-----------------|-----------|------------------------|
| 75 <sup>th</sup> | 0.21 | 0.07, 0.34      | 0.48      | 0.21x height (cm)+0.48 |
| 90 <sup>th</sup> | 0.39 | 0.22, 0.51      | 0.48      | 0.39x height (cm)+0.48 |
| 98 <sup>th</sup> | 0.62 | 0.46, 0.75      | 0.48      | 0.62x height (cm)+0.48 |

*\*Height was not significant in univariate analysis for predicting the 50<sup>th</sup> percentile of FeNO in atopic children without asthma*



## SEATON external validation of non-atopic and atopic children separately

Table E16, Baseline characteristics of SEATON validation cohort (asymptomatic non-asthmatic children).

|                                                | Age 10 years follow up     | Age 15 years follow up   |
|------------------------------------------------|----------------------------|--------------------------|
| <b>Total number with FeNO measurements (n)</b> | N=332                      | N=328                    |
| <b>SPT sensitised<sup>‡</sup> n(%)</b>         | 91/324 (28.1%)             | 97/326 (29.8%)           |
| <b>Height (cm), mean (SD) [range]</b>          | 142.2 (6.7)<br>[114-159.9] | 169.7 (9.0)<br>[144-198] |
| <b>FeNO (ppb), median (IQ)</b>                 | 9 (6.7-13.3)               | 13 (9-21)                |

<sup>‡</sup> SPT sensitisation at age 10 years were defined as positive test to one of the aeroallergens (grass, house dust mite, dog and cat); SPT sensitisation at age 15 years were defined as positive test to one of the aeroallergens (grass, house dust mite and dog).

Table E17. Proposed FeNO percentile developed from MAAS correlated well with percentile within non-asthmatic children within SEATON cohort, stratified by atopic status.

| MAAS FeNO percentiles                                            | Number of SEATON participants had FeNO above MAAS-defined percentile, N (%) | Equivalent percentile in non-asthmatic children from SEATON (95%CI) |
|------------------------------------------------------------------|-----------------------------------------------------------------------------|---------------------------------------------------------------------|
| Healthy non-atopic (n=462 measurements from SEATON)              |                                                                             |                                                                     |
| <b>50<sup>th</sup></b>                                           | 162 (35%)                                                                   | 65 <sup>th</sup> (60-69 <sup>th</sup> )                             |
| <b>75<sup>th</sup></b>                                           | 91 (20%)                                                                    | 80 <sup>th</sup> (76-84 <sup>th</sup> )                             |
| <b>90<sup>th</sup></b>                                           | 39 (8%)                                                                     | 92 <sup>nd</sup> (89-94 <sup>th</sup> )                             |
| <b>98<sup>th</sup></b>                                           | 16 (3%)                                                                     | 97 <sup>th</sup> (94-98 <sup>th</sup> )                             |
| Atopic children without asthma (n=188 measurements from SEATON)* |                                                                             |                                                                     |
| <b>75<sup>th</sup></b>                                           | 60 (32%)                                                                    | 68 <sup>th</sup> (61-75 <sup>th</sup> )                             |
| <b>90<sup>th</sup></b>                                           | 17 (9%)                                                                     | 91 <sup>st</sup> (86-94 <sup>th</sup> )                             |
| <b>98<sup>th</sup></b>                                           | 5 (3%)                                                                      | 97 <sup>th</sup> (94-99 <sup>th</sup> )                             |

\*Height was not significant in univariate analysis for predicting the 50<sup>th</sup> percentile of FeNO in atopic children without asthma

## RADICA study

Table E18. Baseline characteristics of included children and adolescents in RADICA study

|                                      | <b>Asthma<br/>(n=51)</b> | <b>Non asthma<br/>(n=22)</b> | <b>p-value</b>   |
|--------------------------------------|--------------------------|------------------------------|------------------|
| Age (years), median<br>(IQR) [range] | 11 (7.5-16)<br>[5-22]    | 10 (8.3-11.8)<br>[5-22]      | 0.515            |
| Sex (male), n (%)                    | 25 (49.0%)               | 10 (45.5%)                   | 0.981            |
| Ethnicity (White), n<br>(%)          | 27 (52.9%)               | 13 (59.1%)                   | 0.953            |
| Height (cm)<br>[range]               | 147 (22.5)               | 146.0 (18.2)                 | 0.710            |
| SPT sensitisation, n<br>(%)          | 37 (72.5%)               | 12 (54.5 %)                  | 0.218            |
| FeNO (ppb), median<br>(IQR)          | 42 (13.5-77.5)           | 12 (8-16.5)                  | <b>&lt;0.001</b> |

Figure E7. Scattered plot of FeNO vs. height in RADICA patients

Table E19. Validation in RADICA study stratified by atopic status.

| <b>Percentiles</b>                                                                              | <b>Sensitivity</b> | <b>Specificity</b> | <b>PPV</b>     | <b>NPV</b>     | <b>+LR</b> | <b>-LR</b> |
|-------------------------------------------------------------------------------------------------|--------------------|--------------------|----------------|----------------|------------|------------|
| Symptomatic non-atopic children (n=24, 14 [58.3%] asthmatics) using non-atopic percentile chart |                    |                    |                |                |            |            |
| <b>&gt;50<sup>th</sup> percentile</b>                                                           | 42.9%<br>6/14      | 50%<br>5/10        | 54.5%<br>6/11  | 38.5%<br>5/13  | 0.9        | 1.1        |
| <b>&gt;75<sup>th</sup> percentile</b>                                                           | 42.9%<br>6/14      | 70%<br>7/10        | 66.7%<br>6/9   | 46.7%<br>7/15  | 1.4        | 0.8        |
| <b>&gt;90<sup>th</sup> percentile</b>                                                           | 28.6%<br>4/14      | 90%<br>9/10        | 80%<br>4/5     | 47.4%<br>9/19  | 2.9        | 0.8        |
| <b>&gt;98<sup>th</sup> percentile</b>                                                           | 21.4%<br>3/14      | 100%<br>10/10      | 100%<br>3/3    | 47.6%<br>10/21 | ∞          | 0.8        |
| Symptomatic atopic children (n=49, 37 [75.5%] asthmatics) using atopic percentile chart         |                    |                    |                |                |            |            |
| <b>Percentiles<sup>Ⓜ</sup></b>                                                                  | <b>Sensitivity</b> | <b>Specificity</b> | <b>PPV</b>     | <b>NPV</b>     | <b>+LR</b> | <b>-LR</b> |
| <b>&gt;75<sup>th</sup> percentile</b>                                                           | 75.7%<br>28/37     | 91.7%<br>11/12     | 96.6%<br>28/29 | 55%<br>11/20   | 9.1        | 0.3        |
| <b>&gt;90<sup>th</sup> percentile</b>                                                           | 45.9%<br>17/37     | 100%<br>12/12      | 100%<br>17/17  | 37.5%<br>12/32 | ∞          | 0.5        |
| <b>&gt;98<sup>th</sup> percentile</b>                                                           | 21.6%              | 100%               | 100%           | 29.3%          | ∞          | 0.8        |

---

\*+LR: sensitivity/(1-specificity);  $\square$  -LR: (1-sensitivity)/specificity.  $\square$  Height was not significant in univariate analysis for predicting the 50<sup>th</sup> percentile of FeNO in atopic children without asthma

**References:**

1. Drake S, Wang R., Healy L et al. Diagnosing asthma with and without aerosol generating procedures. J Allergy Clin Immunol Pract 2021;9(12):4243-4251.
